# Supplementary material for: Zeolitic Imidazole Framework-90-Based Pesticide Smart-Delivery System with Enhanced Antimicrobial Performance
Source: Nanomaterials (Basel). 2022 Oct 15;12(20):3622. doi: 10.3390/nano12203622 (PMC9607848; doi:10.3390/nano12203622)
Supplement: Supplementary file 1 [file nanomaterials-12-03622-s001.zip › nanomaterials-1943514-supplementary.pdf]

## Supplementary materials

# Zeolitic Imidazole Framework-90-Based Pesticide Smart-Delivery System with Enhanced Antimicrobial Performance

You Liang <sup>1</sup>, Sijin Wang <sup>1</sup>, Hongqiang Dong <sup>2</sup>, Siwen Yu <sup>1</sup>, Huijuan Jia <sup>1</sup>, Jin Wang <sup>1</sup>, Yijia Yao <sup>1</sup>, Yuanfeng Wang <sup>1</sup>, Jiehui Song <sup>1</sup> and Zhongyang Huo <sup>1\*</sup>

<sup>1</sup> Co-Innovation Center for Modern Production Technology of Grain Crop/Jiangsu Key Laboratory of Crop Genetics and Physiology, Yangzhou University, Yangzhou 225009, China

<sup>2</sup> Xinjiang Production and Construction Corps Key Laboratory of Protection and Utilization of Biological Resources in Tarim Basin, Tarim University, Alaer 843300, China

\* Correspondence: huozy69@163.com; Tel.: +86-514-87972363; Fax: +86-514-87972363

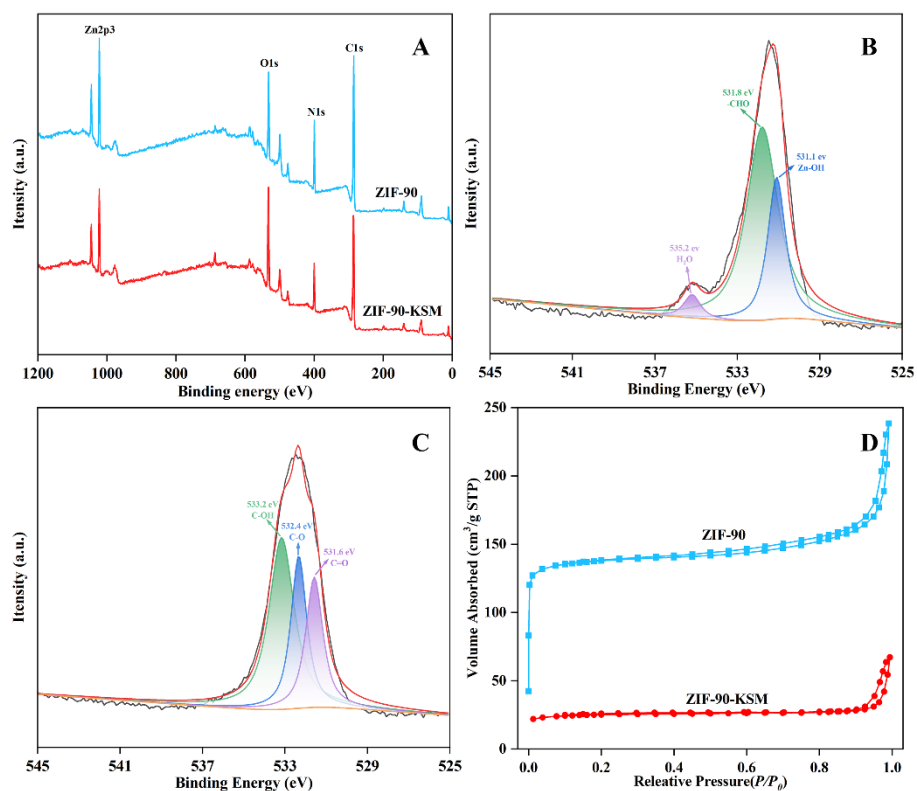

Figure S1. Broad range XPS spectra of ZIF-90 and ZIF-90- KSM (A). Deconvolution of the high-resolution scan of O1s spectra of ZIF-90 (B) and ZIF-90-KSM (C). N<sub>2</sub> adsorption-desorption isotherms of ZIF-90 and ZIF-90-KSM (D)

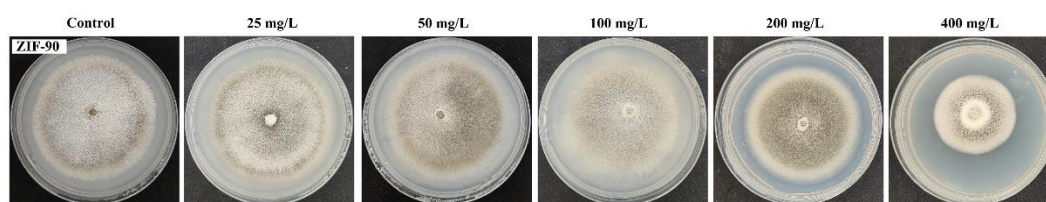

Figure S2. Images of the fungicidal activity of ZIF-90 against *Magnaporthe oryzae*

Table S1. Surface and porosity properties of the samples.

| Sample     | BET surface area<br>(m <sup>2</sup> /g) | Pore volume<br>(cm <sup>3</sup> /g) | Average pore size<br>(nm) |
|------------|-----------------------------------------|-------------------------------------|---------------------------|
| ZIF-90     | 553.26                                  | 0.27                                | 2.00                      |
| ZIF-90-KSM | 96.60                                   | 0.06                                | 2.43                      |

Table S2. Comparison of various carriers used to protect KSM from photolysis.

| Carrier                                | UV-light stability                         |                            |                                                                    | Ref. |
|----------------------------------------|--------------------------------------------|----------------------------|--------------------------------------------------------------------|------|
|                                        | UV Light                                   | Sample state               | Degradation rate                                                   |      |
| Pectin-conjugated silica microcapsules | light intensity, $700 \mu\text{W cm}^{-2}$ | Suspension in PBS solution | The degradation is 5 times lower than that of technical after 60 h | [29] |
| Pectin                                 | light intensity, $700 \mu\text{W cm}^{-2}$ | Suspension in PBS solution | Reduced degradation by approximately 30%                           | [41] |
| Silica nanospheres                     | light intensity, $700 \mu\text{W cm}^{-2}$ | Suspension in PBS solution | The degradation is 4 times lower than that of technical after 72 h | [42] |

Table S3. Fungicidal activity of KSM formulations as KSM aqueous solution and ZIF-90-KSM against *Magnaporthe oryzae*.

| Treatment            | Regression equation | $EC_{50}$<br>(95% confidence interval)<br>(mg/L) | Correlation coefficient<br>( <i>r</i> ) |
|----------------------|---------------------|--------------------------------------------------|-----------------------------------------|
| KSM aqueous solution | $y=0.79+1.20x$      | 4.54 (3.95-5.17)                                 | 0.987                                   |
| ZIF-90-KSM           | $y=0.65+1.76x$      | 2.33 (2.04-2.61)                                 | 0.993                                   |

Notes:  $EC_{50}$  Inhibitory concentration that inhibit 50% of the exposed fungus.

[29] Fan, C.; Guo, M.; Liang, Y.; Dong, H.; Ding, G.; Zhang, W.; Tang, G.; Yang, J.; Kong, D.; Cao, Y. Pectin-conjugated silica microcapsules as dual-responsive carriers for increasing the stability and antimicrobial efficacy of kasugamycin. *Carbohydr. Polym.* **2017**, *172*, 322–331. <https://doi.org/10.1016/j.carbpol.2017.05.050>.

[41] Liu, Y.; Sun, Y.; Ding, G.; Geng, Q.; Zhu, J.; Guo, M.; Duan, Y.; Wang, B.; Cao, Y. Synthesis, characterization, and application of microbe-triggered controlled-release kasugamycin–pectin conjugate. *J. Agric. Food Chem.* **2015**, *63*, 4263–4268. <https://doi.org/10.1021/jf5055062>.

[42] Ding, G.; Li, D.; Liu, Y.; Guo, M.; Duan, Y.; Li, J.; Cao, Y. Preparation and characterization of kasuga-silica-conjugated nanospheres for sustained antimicrobial activity. *J. Nanopart. Res.* **2014**, *16*, 1–10. <https://doi.org/10.1007/s11051-014-2671-0>.
